# Effect of Pre-Exercise Caffeine Intake on Endurance Performance and Core Temperature Regulation During Exercise in the Heat: A Systematic Review with Meta-Analysis

Catherine Naulleau <sup>1,2</sup>, David Jeker <sup>1,2</sup>, Timothée Pancrate <sup>1</sup>, Pascale Claveau <sup>1</sup>, Thomas A. Deshayes <sup>1,3</sup>, Louise M. Burke <sup>4</sup>, Eric D.B. Goulet <sup>1,3</sup>

<sup>1</sup> Faculty of physical activity sciences, University of Sherbrooke, P.Q., Canada

<sup>2</sup> Institut national du sport du Québec, Montréal, P.Q., Canada

<sup>3</sup> Research Center on Aging, University of Sherbrooke, P.Q., Canada

<sup>4</sup> Mary MacKillop Institute for Health Research, Australian Catholic University, Melbourne, Australia

**Running head:** Caffeine, endurance performance and thermoregulation in the heat.

## Authors ORCIDs

Naulleau: 0000-0003-0109-198X

Jeker: 0000-0002-1673-4776

Pancrate: 0000-0002-4161-5875

Claveau: 0000-0002-7796-3919

Deshayes: 0000-0002-7620-1939

Burke: 0000-0001-8866-5637

Goulet: 0000-0001-5117-9977

**Correspondence:** Eric D.B. Goulet, Ph.D.  
Performance, Hydration and Thermoregulation Laboratory  
University of Sherbrooke  
2500 boul. de l'Université  
Sherbrooke, Québec, Canada  
J1K 2R1  
E-mail: [eric.goulet@usherbrooke.ca](mailto:eric.goulet@usherbrooke.ca)  
Phone number: 1-819-821-8000 \*62728  
Fax number: 1-819-821-7970

## Abstract

**Background:** Heat is associated with physiological strain and endurance performance (EP) impairments. Studies have investigated the impact of caffeine intake upon EP and core temperature ( $C_T$ ) in the heat, but results are conflicting. There is a need to systematically determine the impact of pre-exercise caffeine intake in the heat.

**Objective:** Use a meta-analytical approach to determine the effect of pre-exercise caffeine intake on EP and  $C_T$  in the heat.

**Design:** Systematic review with meta-analysis.

**Data sources:** Four databases and cross-referencing.

**Data analysis:** Weighted mean effect summaries using random-effects models for EP and  $C_T$ , as well as meta regressions with robust standard errors to explore confounders.

**Study selection:** Placebo-controlled, randomized studies in adults ( $\geq 18$  yrs old) with caffeine intake at least 30 min before endurance exercise  $\geq 30$  min, performed in ambient conditions  $\geq 27^\circ\text{C}$ .

**Results:** Respectively 6 and 12 studies examined caffeine's impact on EP and  $C_T$ , representing 52 and 205 endurance-trained individuals. On average, 6 mg/kg body mass of caffeine were taken 1 h before exercises of  $\sim 70$  min conducted at  $34^\circ\text{C}$  and 47% relative humidity. Caffeine supplementation improved EP by  $2.0 \pm 0.7\%$  (95% CI: 0.6 to 3.5%) and increased the rate of change in  $C_T$  by  $0.10 \pm 0.04^\circ\text{C}/\text{h}$  (95% CI: 0.03 to  $0.16^\circ\text{C}/\text{h}$ ), compared with the ingestion of a placebo.

**Conclusion:** Caffeine ingestion of 6 mg/kg body mass  $\sim 1$  h before an exercise in the heat provides a worthwhile improvement in EP of 2%, while trivially increasing the rate of change in  $C_T$  by  $0.10^\circ\text{C}/\text{h}$ .

**Keywords:** caffeine, endurance, heat, hot, performance, temperature, thermoregulation, warm.

## 1 Introduction

Many athletes use performance-enhancing supplements during competitive events with the hope of gaining an edge over their opponents. Caffeine, classified as a methylxanthine [1], is a widely used ergogenic aid with robust evidence of performance benefits for a range of exercise and sporting activities [2]. Indeed, since its removal from the World Anti-Doping Agency list of banned substance in 2004 and reclassification to the monitoring list [3], measurement of the caffeine content in urine samples collected at Doping Control during national and international competitions suggested that about 76% of athletes from various sports consumed caffeine prior to or during sporting events [3]. In addition, 89% of athletes competing at the 2005 Ironman™ triathlon world championships revealed that they were planning on using a caffeine substance before and/or during the event [4]. This is not surprising, as pre-exercise caffeine intake of 2-6 mg/kg body mass has generally been shown to confer a worthwhile improvement in endurance performance (EP) under thermoneutral conditions [2, 5-9]. It is proposed that caffeine may contribute to enhance exercise performance by increasing motivation [10] and alertness [11], reducing perceived exertion [12-14] and fatigue [14, 15], enhancing the mobilization of intracellular calcium and free fatty acids [16], and most importantly by acting as an adenosine receptor antagonist [17].

Exercising under warm or hot conditions imposes unique physiological challenges which are ultimately evidenced by the inability of athletes to perform as well as in thermoneutral conditions [18, 19]. Because the extent of changes in physiology [18] and EP [19] during exercise may be dependent upon ambient temperature, humidity and airflow, an honest and precise evaluation of the impact of any supplement that may change physiology on EP can only be reliably obtained while considering the effect of the environment.

The impact of caffeine on EP,  $C_T$  and physiological functions have been examined with a timing of supplementation occurring either before exercise only, during exercise only or before and during exercise [20]. Peak caffeine concentration in the blood after oral ingestion occurs 30 to 90 min post consumption for low, moderate and high caffeine doses [21]. Moreover, caffeine's half-life is ~3-7 h in adults [22]. Hence, any attempt to clearly understand caffeine's effect on the body during exercise in relation to the dosage administered is likely to be compromised if more than one caffeine dose is provided. On the other hand, supplementation of a single dose of caffeine before exercise onset provides the opportunity for the compound to produce a predictable and prolonged effect on the metabolism, thereby allowing to better pinpoint, isolate and understand the impact of caffeine during a subsequent exercise.

Several studies have examined the effect of pre-exercise caffeine supplementation on performance during endurance exercise conducted under warm or hot ambient conditions. Overall, results are equivocal, with some showing statistically significant improvements in EP [12, 13, 23, 24] while others did not [14, 25-31]. On the other hand, results of some studies suggest that caffeine supplementation may increase resting energy expenditure [32, 33], diuresis [34, 35], oxygen consumption [36], decrease sweat rate [35] and *ad libitum* fluid intake [35] and impair cutaneous blood flow [37], all of which singularly or in combination may contribute to increase heat stress during exercise. Because of the potential role played by heat strain on performance deterioration [18], several investigations have therefore examined the impact of pre-exercise caffeine intake on core body temperature ( $C_T$ ) regulation during exercise [12-14, 23-25, 27-29, 33-35, 38-42]. However, the outcome of this literature is inconclusive, with divergent results regarding caffeine's impact on EP and  $C_T$  during exercise being potentially explained by methodological issues, sample sizes and different pre-exercise doses.

Peel, McNarry [43] concluded in a recent meta-analysis that the use of caffeine during exercise in the heat increases  $C_T$  without providing any ergogenic benefit. While this meta-analysis shed some light on the effectiveness of caffeine ingestion upon EP and  $C_T$  regulation in the heat, this work only qualified the importance of these effects. Specifically, it did not attempt to determine the magnitude of the changes in EP or  $C_T$  regulation, which proves to be key and pivotal information for the decision to use or not use caffeine when considering one's tolerance to heat and the day-to-day normal fluctuation in performance. Importantly, results of studies that provided caffeine before exercise onset were combined with those where caffeine was taken both before and during exercise (i.e., maintenance dose), which may have confounded the results.

The combination of the increasing number of sporting events taking place in warm or hot environments and the popularity of caffeine as an ergogenic aid provide a strong rationale for a specific and thorough review of the effect of caffeine supplementation on EP and  $C_T$  regulation during exercise performed under warm or hot conditions. Therefore, this meta-analysis aims to assess the magnitude of the effect of pre-exercise caffeine intake on EP (1) and  $C_T$  regulation in warm or hot conditions (2) and to identify potential factors that may impact the relationship between the control of  $C_T$  and caffeine intake (3). The results of this meta-analysis will be useful for athletes and their support teams to evaluate the benefits and risks of an acute caffeine consumption before endurance events in warm or hot conditions.

## **2 Methods**

### **2.1. Search strategy for identification of studies**

The search strategy used for study selection is presented in Figure 1. A first search was performed using cross-referencing of the reference sections of five meta-analyses [2, 5, 7, 44, 45] retrieved in an umbrella meta-analysis [8] and two narrative reviews [9, 46]. Then, a traditional literature

search, limited to original peer-reviewed articles published in French or English, was performed on MEDLINE, SPORTDiscus, AMED and CINAHL databases, combining a “title field” and an “abstract field” research using the following keywords alone or in combination with truncation: caffein\*, dehydrat\*, endurance, exercise, heat, hot, humid\*, temper\*, therm\*, performance. The exact search strategy can be found in supplementary material 1. The last search of the literature was done on September 1<sup>st</sup> 2021.

All references were merged in an Excel spreadsheet and duplicates were removed. Then, a first selection based on the title was performed; afterward, the abstract and method sections of all potential articles were read. When exercise was performed in hot or warm conditions, caffeine was ingested and EP or C<sub>T</sub> measured, the methodological section was read to verify eligibility. Thesis, published abstracts, case studies, non-peer-review manuscripts and conference proceedings were not considered. When needed, authors of included studies were contacted and asked to share raw data or provide further details/missing values.

## **2.2. Criteria for considering studies for inclusion in the meta-analysis**

Inclusion criteria were: (1) placebo-controlled, randomized studies on healthy adults  $\geq 18$  yrs old; (2) endurance exercise including cycling, running and walking  $\geq 30$  min; (3) ambient temperature  $\geq 27^{\circ}\text{C}$ ; (4) caffeine intake at least 30 min before exercise and no caffeine provided during exercise and; (5) C<sub>T</sub> measured as rectal, esophageal or gastrointestinal temperature. Studies were excluded when: (1) caffeine was ingested with another compound, with the exception of water; (2) caffeine was not swallowed (i.e., mouth rinse); (3) participants wore fire protective equipment which would affect thermoregulation and; (4) intermittent exercise was performed.

### **2.3. Assessment of trial quality**

Trial quality assessment using a scale can influence the interpretation of results of meta-analyses [47]; thereby, trial quality assessment was not performed in the present meta-analysis.

### **2.4. Data extraction**

Data regarding characteristics of the (1) studies; (2) participants; (3) exercise protocols; (4) caffeine intake protocols and; (5) EP or C<sub>T</sub> were extracted and coded in spreadsheets using double data entry. Any disagreement was discussed, and a consensus was reached. When not provided by authors, data only available in figures were extracted using WebPlotDigitizer.

### **2.5. Confounding variables**

The effect of *a priori* identified potential confounding variables on the relationship between caffeine intake and EP or C<sub>T</sub> such as ambient temperature, humidity, exercise duration, exercise intensity, caffeine dose and the elapsed time between caffeine ingestion and the onset of exercise was verified. For Cohen, Nelson [26], only wet-bulb globe temperature was reported. Therefore, ambient temperature and humidity were taken as found in Armstrong, Casa [46].

### **2.6. Exercise duration and intensity and participants $\dot{V}O_{2\max}$**

Total exercise duration was computed as the average exercise time completed during both the caffeine (experimental) and placebo conditions. When a pre-load was performed prior to a performance test, it was included in the total exercise duration time. Exercise intensity was taken as the average of the mean % maximal oxygen consumption ( $\dot{V}O_{2\max}$ ) at which both conditions were performed. A weighted average technique was used for studies that utilized a combination of exercise intensities [48]. When not measured by authors, exercise intensity was estimated and computed as explained by Goulet [48] and Goulet [49]. Finally, for Cohen, Nelson [26], exercise intensity could not be calculated due to a lack of data.

## 2.7. Assessment of endurance performance

To assist the understanding and interpretation of findings, all performance outcomes were transformed and are reported as % changes in power output between the caffeine and placebo conditions. For studies that used a time-trial type exercise protocol and reported the mean power output during exercise, the percent changes in EP were calculated using the following equation:

Mean power output in the caffeine condition (W) - mean power output in the placebo condition (W) / mean power output in placebo condition (W)  $\times$  100 (1)

Endurance performance reported in kJ was converted to power output (W) [12, 25]. The same formula was used for studies that reported time-trial completion time, but results were multiplied by -1 so that a reduction in time, was converted to a positive value to indicate an increase in performance. For Ping, Keong [13] that used a fixed-intensity test to exhaustion, performance was transformed to percent changes in power output (W) using the following equation [50]:

Mean time to exhaustion (min) in the caffeine condition - mean time to exhaustion (min) in the placebo condition / mean time to exhaustion (min) in the placebo condition  $\times$  100 / (% $\dot{V}O_{2max}$ ) at which the test was performed / 6.4) (2)

Conversions between time trial and power outputs were undertaken with the assumption that a 1% change in running time-trial time equals a 1% change in power output, and that a 0.4% change in cycling time-trial time equals a 1% change in power output [50].

Out of the 6 [12, 13, 25-27, 29] studies that met the inclusion criteria for EP, access to raw experimental data was available for 4 investigations [12, 25, 27, 29]. Accordingly, for these studies, mean changes in EP and associated standard errors were computed directly from available raw data. The remaining two studies [13, 26] provided the mean EP data obtained with the placebo and caffeine conditions. For Ping, Keong [13] the variance associated with the change in EP was



calculated from the provided  $p$ -value, assuming a value  $\leq 0.05$  to represent  $p = 0.05$ . Cohen, Nelson [26] provided no variance associated with the mean change in EP. It was therefore estimated using an imputed correlation coefficient of 0.88, representing the weighted mean correlation coefficient computed from values of 4 [12, 25, 27, 29] individual studies.

## **2.8. Assessment of core temperature changes during exercise**

Changes in  $C_T$  were assessed using from measurements taken from esophageal [39, 42], gastrointestinal [12, 27] or rectal [13, 23-25, 29, 34, 35, 38] regions; these areas provide slightly different figures of  $C_T$  during exercise. However, this is irrelevant in the context of the current meta-analysis where we were focused on changes in  $C_T$  within each of the included studies. More specifically, the variable of interest was taken as the rate ( $^{\circ}\text{C}/\text{h}$ ) of change in  $C_T$  within each of the placebo and caffeine conditions of each of the included studies. When more than two assessments of  $C_T$  were performed within a single study, the mean rate of change in  $C_T$  from one measurement point to the other within a condition was computed for each of the placebo and caffeine condition. To obtain the overall mean rate of change in  $C_T$  between the placebo and caffeine conditions within a single study, first, the mean rate of change in  $C_T$  observed between measurement points within the placebo condition was subtracted from that obtained within the caffeine condition and, second, the mean and associated standard error of all changes were computed. Ping, Keong [13] measured  $C_T$  only at the start and end of exercise for both the caffeine and placebo conditions. For this study, first, the mean rate of change in  $C_T$  in the placebo and caffeine conditions was computed by subtracting the first from the last measurement of  $C_T$  and, second, using the  $p$ -value associated with the change in  $C_T$  within each of the conditions the standard errors were computed. To obtain the overall mean rate of change in  $C_T$  between the placebo and caffeine conditions, the mean rate of change in  $C_T$  observed with the placebo condition was subtracted from that obtained in the

caffeine condition, and the associated standard error was computed using a correlation coefficient between measurements of 0.50 [51].

## **2.9. Statistical analyses**

### **2.9.1. Software**

Data were analyzed using the Microsoft Office Excel 2020 (version 1902, Redmond, WA, USA), MetaXL [52], Comprehensive Meta-Analysis (version 2.2.064, Englewood, NJ, USA), STATA/MP (version 14, College Station, TX, USA) and IBM SPSS Statistics (version 21, Armonk, NY, USA) software.

## **2.10. Weighted mean effect summaries**

The weighted mean effect summaries were determined using method of moment random-effects model, and results were considered statistically significant when the confidence intervals (CI) did not include 0. Some studies examined the effect of more than one caffeine dose on EP or  $C_T$  regulation during exercise. To prevent the violation of the assumption of independence among research observations, data which examined the effect of different caffeine doses within the same study were merged [24, 26, 27], considering the caffeine dose to be representative of the average dose provided. Del Coso, Estevez [34] provided a single dose of caffeine but performed experiments where the placebo and caffeine were provided with or without water; for both the placebo and caffeine conditions results of those two trials were combined. Hunt, Hospers [42] examined the impact of caffeine consumption in habituated and non-habituated consumers; for this study, data from both trials were merged. Studies examined  $C_T$  regulation during fixed-intensity as well as during time-trial conditions. We verified whether there was a difference in the rate of increase in  $C_T$  between the different exercise protocols; the difference was  $< 0.1^\circ\text{C}/\text{h}$ . Therefore,

data from both exercise protocols were aggregated for analyses. Results of the weighted mean effect summaries are reported as means  $\pm$  standard errors and/or 95% CI.

### **2.11. Practical significance of the weighted mean effect summaries**

The qualitative interpretation of the practical significance of the effect of caffeine supplementation on EP and  $C_T$  regulation during exercise were performed as recommended by Hopkins [53], while using minimal threshold changes in EP and  $C_T$  of respectively 1.5% [54] and 0.25°C [55].

### **2.12. Heterogeneity, publication bias and sensitivity analysis**

Cochran's Q and  $I^2$  statistics were both used to assess between-study heterogeneity and the degree of inconsistency among results of included studies [56]. Cochran's Q test was considered significant at  $p \leq 0.1$  [57]. The following classification was used to interpret the  $I^2$  statistic: low (< 40%), moderate (40-59%), substantial (> 60%) [58]. Publication bias was performed using visual assessment of funnel plots with Trim and Fill adjustments [59]. A sensitivity analysis was performed on each of the forest plots by removing each study once from the models to determine whether this would change the magnitude of the outcome summaries.

### **2.13. Meta-regression analyses**

Meta-regressions were performed by regressing the mean differences in the rate of increase in  $C_T$  between the placebo and caffeine conditions on each of the *a priori* identified confounders; no regression analyses were performed regarding EP due to the low number of included studies. Meta-regression analyses were performed using method of moment random-effects model, with 95% robust (Huber-Eicher-White-sandwich) standard errors [60].

### **3 Results**

#### **3.1. Search results and characteristics of the included studies**

After duplicates were removed, a total of 926 titles were evaluated (Figure 1). In the remaining 49 articles assessed for eligibility, a total of 13 [12, 13, 23-27, 29, 34, 35, 38, 39, 42] were included in the meta-analysis. Six of these investigations [12, 13, 25-27, 29] provided data related to EP, 12 papers [12, 13, 23-27, 29, 34, 35, 38, 42] reported on  $C_T$  regulation during exercise (Table 1), and 5 studies [12, 13, 25, 27, 29] contained both EP and  $C_T$  data. The studies were published between 1994 and 2021 in 9 different peer-reviewed journals. Seven studies were conducted in the USA [23-27, 35, 38] and 1 in each of those countries: Australia [42], Belgium [29], Japan [39], Malaysia [13], Spain [34] and the UK [12].

#### **3.2. Participants' characteristics**

A total of 212 physically active to well-trained individuals was represented among the 13 studies included in the meta-analysis, with women representing 10% of the total participants. Mean sample size was  $16 \pm 15$  individuals per study (range 7-59). More specifically, results for EP were derived from a total of 52 participants, whereas those for  $C_T$  regulation were provided by 205 participants, with women representing 12 and 10% of the subsamples, respectively. The mean age, height, body mass and  $\dot{V}O_{2max}$  of the participants for those studies which assessed EP and  $C_T$  regulation were respectively  $25 \pm 4/24 \pm 2$  yrs,  $176 \pm 5/176 \pm 4$  cm,  $71 \pm 8/73 \pm 6$  kg and  $53 \pm 5$  ( $n = 5$ )/ $52 \pm 6$  ( $n = 11$ ) mL/kg/min.

#### **3.3. Characteristics of the placebo/caffeine administration and exercise protocols**

All studies included placebos and were conducted using either single [27, 39]- or double [12, 13, 23-26, 29, 34, 35, 38, 42]-blinded fashion. With the exception of Roti, Casa [24], all studies were performed in a crossover manner where participants acted as their own control. The mean

characteristics for the protocols used in the studies that assessed EP and  $C_T$  regulation respectively were caffeine dose ( $6 \pm 2$ ;  $6 \pm 2$  mg/kg body mass), elapsed time between the placebo or caffeine intake and onset of exercise ( $65 \pm 12$ ;  $58 \pm 14$  min), caffeine restriction time leading to the experiments ( $48 \pm 34$  (n = 4);  $43 \pm 35$  h (n = 10)), ambient temperature and relative humidity ( $32 \pm 4$ ,  $34 \pm 4^\circ\text{C}$ ;  $52 \pm 15$ ,  $46 \pm 13\%$ ), exercise duration ( $79 \pm 23$ ;  $70 \pm 24$  min) and exercise intensity ( $68 \pm 11$ ;  $55 \pm 8\% \dot{V}O_{2\text{max}}$ ). Wind speed was reported in only three studies [23, 34, 42]; therefore, these values are not presented. Exercise protocols consisted of either a running time-trial [26, 27], a fixed-intensity cycling or walking period [24, 34, 35, 38, 39, 42], a pre-load cycling period followed by a time-trial [12, 23, 25, 29] or a running test to exhaustion [13].

### 3.4. Weighted mean effect summaries

Except for one study that demonstrated a negative impact of caffeine supplementation on EP [29], caffeine intake prior to exercise improved performance in all other studies, with gains ranging in magnitude from trivial to important (Figure 2). The combined results showed a performance improvement with pre-exercise caffeine supplementation of  $2.0 \pm 0.7\%$  (95% CI: 0.6 to 3.5%), with an 80% chance to confer a worthwhile improvement in cycling and running performance under field conditions. Removing each study once from our model revealed changes in EP fluctuating between 1.4 to 2.4%. Distribution of point estimates around the weighted mean effect summaries was appropriate, which suggests no publication bias. Heterogeneity was low with an  $I^2$  of 26% and a Cochran's  $Q$  of 6.8,  $p = 0.2$ .

Figure 3 shows that caffeine supplementation increased the rate of change in  $C_T$  by  $0.10 \pm 0.04^\circ\text{C}/\text{h}$  (95% CI: 0.03 to  $0.16^\circ\text{C}/\text{h}$ ), compared with the ingestion of a placebo which, from a practical perspective, represents a trivial change over a 60 min period of exercise. None of the studies included in the model affected the rate of change in  $C_T$  more than any other study. Indeed,

reanalysis of findings with the exclusion of any one study once from the model revealed changes in the rates of increase in  $C_T$  varying from 0.07 to 0.12°C/h. Examination of the funnel plot shows that there was an appearance of a slight publication bias with more studies at the bottom right than left of the mean. However, a trim and fill analysis indicated that adjusting for those missing studies decreases the mean rate of change in  $C_T$  from 0.10 to 0.07°C/h, which represents a trivial adjustment in the mean, but would nevertheless reverse the statistical significance of the weighted mean effect summary with a 95% CI of -0.002 to 0.148. Inconsistency among research observations was moderate with an  $I^2$  of 36% and a Cochran's  $Q$  of 17.1,  $p = 0.10$ . Studies that included time-trials ( $0.07 \pm 0.03$ , 95% CI: 0.02-0.12,  $n = 5$ ) in their exercise protocol did not show a greater rate of increase in  $C_T$  compared to studies using only fixed-intensity exercise ( $0.13 \pm 0.07$ , 95% CI: 0.006-0.040,  $n = 7$ )

### 3.5. Meta-regression analyses

Figure 4 demonstrates that there was no significant relationship between the changes in the rate of increase in  $C_T$  between the caffeine and placebo conditions during exercise and the caffeine dosage (a) or the timing between caffeine ingestion and the start of exercise (b). Figure 5 shows the correlations between the changes in the rate of increase in  $C_T$  in the caffeine and placebo conditions during exercise and temperature (a), relative humidity (b), exercise duration (c) and exercise intensity (d). With the exception of exercise intensity, none of the slopes was statistically significant. Except for relative humidity, results highlighted the fact that as temperature, exercise duration and exercise intensity increased, there was a progressive decrease in the rate of  $C_T$  rise with caffeine, compared with the placebo. The model revealed that at a threshold ambient temperature of 42.3°C and exercise intensity of 68% of  $\dot{V}O_{2max}$ , the rate of the rise in  $C_T$  with caffeine should be lower than with the placebo. Combining exercise intensity and temperature in

the same model explained as much as 61% of the rise in  $C_T$ , with relative humidity, exercise duration and caffeine dose contributing trivially to improve the precision of the model (~1%).

#### **4. Discussion**

While several systematic reviews, including meta-analyses [2, 5, 7, 44, 45] and an umbrella review [8], have reported on the impact of pre-exercise caffeine ingestion on EP, specific investigations of its impact in warm or hot environments are limited. Therefore, the goal of the current work was to extend that of the previous meta-analyses by exclusively focussing on the impact of pre-exercise caffeine ingestion on EP and  $C_T$  during exercise undertaken in the heat. Our results indicated that caffeine (1) provides a statistically significant and worthwhile improvement in EP and (2) is associated with a significant, although practically trivial, increase in the rate of rise in  $C_T$  in warm or hot conditions.

Our results show that pre-exercise caffeine supplementation improves EP in a practically meaningful manner, which contradicts with the findings of Peel, McNarry [43] who observed a trivial effect of caffeine supplementation on EP in a warm environment. The discrepancy between findings might, on the one hand, be linked to the criteria used for study inclusion. Indeed, while we limited our analysis to those studies that provided a single dose of caffeine prior to exercise onset, Peel, McNarry [43] amalgamed all studies conducted in the heat, irrespective of the moment of caffeine administration relative to exercise onset or the number of doses provided during the protocol. On the other, we computed the percent change in performance between the placebo and caffeine trial and compared it to a threshold relative to the day-to-day normal fluctuation in EP. In contrast, Peel, McNarry [43] limited their analysis to the reporting of an Hedge G's.

The mean EP improvement of 2% observed in the current meta-analysis is similar to the outcome derived from the meta-analysis undertaken by Southward, Rutherford-Markwick [2]. Indeed, their

assessment of a mix of studies completed in a wide range of ambient temperatures, including heat, identified an improvement in mean power output of 3% associated with caffeine ingestion. However, this investigation lacked a specific analysis of the impact of ambient temperature on this effect. Nevertheless, given the low proportion of studies conducted in the heat in this analysis, which implies that the weight of those performed in a cooler environment was much larger, our results could suggest that pre-exercise caffeine intake has a similar effect on EP in hot and temperate environments.

To test this issue within a single study, Ganio, Johnson [23] investigated a protocol involving 90 min of cycling followed by a 15 min performance trial at 12 or 33°C, in which participants consumed 3 mg/kg body mass of caffeine before and during exercise (total of 6 mg/kg body mass). Compared with the placebo, caffeine intake improved EP in the heat, although not significantly, close to twofold compared with the temperate conditions (4% at 12°C; 7% at 33°C). Whether these findings support our assertion that pre-exercise caffeine intake has a similar effect on EP in temperate and hot environments or, to the contrary, that caffeine intake may confer an advantage in the latter environment is not clear. However, it must be considered that this study provided caffeine during exercise and one of the conditions was conducted in a cool rather than a temperate environment. Nevertheless, as potentially suggested by the results of this study Ganio, Johnson [23], pre-exercise supplementation with caffeine may be particularly relevant for endurance exercise conducted in the heat. Indeed, caffeine enhances dopamine signaling in the brain [61] through its effect on adenosine receptors [62, 63]. In a series of studies conducted in a temperate (18°C) and hot environment (30°C), Watson, Hasegawa [64] observed that the pre-exercise administration of a dopamine/noradrenaline reuptake inhibitor failed to alter time-trial effort in the temperate condition, but was associated with a 9% improvement in the heat. It was proposed that



the augmented brain concentration of dopamine counteracted the hyperthermia-induced decrease in motivation and drive, thereby allowing an improved performance [65].

Our results showed that, compared with a placebo, pre-exercise caffeine ingestion significantly increases the rate of change in  $C_T$  during exercise in warm or hot environments by  $\sim 0.10^\circ\text{C}/\text{h}$ . However, it is important to underline that, from a practical point of view, such a rate of increase in  $C_T$  is trivial, at least for short endurance exercise duration of 1-2 h. Indeed, the normal daily fluctuation in core temperature is of the order of  $\sim 0.25^\circ\text{C}$  [66]. Why caffeine appears to increase the rate of the rise in  $C_T$  during exercise is not clear. However, analyses showed that the changes in the rate of increase in  $C_T$  between conditions do not seem to be related to confounders such as ambient temperature, relative humidity, exercise duration, nor the dosage and the timing of the caffeine intake prior to exercise. Interestingly, at higher exercise intensities, there was a significant decline in the rate of the rise in  $C_T$  with caffeine compared with placebo; specifically, our modelling showed that at exercise  $> 69\% \dot{V}O_{2\text{max}}$ , the rate of the rise in  $C_T$  was greater in the placebo condition. Nonetheless, such results must be interpreted carefully given that only simple meta-regressions were performed and that other confounding factors could have influenced this relationship. Notwithstanding, this observation may provide some reassurance that during a typical training or race, pre-exercise caffeine intake is unlikely to have a significant impact on thermoregulation.

Whether the greater rate of rise in  $C_T$  with caffeine can be attributed to an enhanced rate of heat production or a lowered rate of heat dissipation is unknown. However, results of previous studies do not support impaired heat loss mechanisms, even in the heat, as a potential concern [23, 33]. Hence, an increase in internal heat production may potentially account for the greater rate of rise in  $C_T$  with caffeine ingestion. Although speculative, the increased  $C_T$  with caffeine ingestion may

be caused by the higher dopamine levels within the brain. Indeed, it has been demonstrated that intracerebroventricular injection of dopamine produces hyperthermia in rabbits and goats [67]. Several studies that showed that caffeine supplementation increased time-trial EP also demonstrated a greater rate of rise in  $C_T$ , compared with the placebo [12, 25, 27, 29]. In those studies, of course, part of the greater rise in  $C_T$  with caffeine may simply be explained by the greater intensity of exercise.

Of potential practical importance is the consideration that differences in the rate of the rise in  $C_T$ , if this remains constant during prolonged exercise (i.e., > 2 h), may expose athletes who participate in ultra endurance events such as Ironman<sup>TM</sup> or ultra-marathons in hot conditions to higher risks of heat-related fatigue or illnesses after caffeine consumption. This assertion is particularly relevant given the likelihood that such athletes will consume carbohydrates (CHO) and take caffeine maintenance doses throughout the events. Here, maintenance of high dopamine levels in the brain, as a result of recurrent intake of caffeine during exercise, could maintain the drive for the caffeine-induced increase in  $C_T$ . Furthermore, close observation of pertinent literature suggests that the combination of caffeine and CHO intake during exercise may interact to increase  $C_T$ . For instance, compared with the intake of CHO alone during exercise, several studies [31, 34, 68] have observed an increased  $C_T$  when caffeine was provided before exercise along with CHO + caffeine during steady-state exercise. It is unclear why the co-ingestion of caffeine and CHO appears to induce a disproportional increase in  $C_T$ . Although speculative, it may be related to the fact that CHO ingestion has been shown to increase dopamine release in the brain, at least in rodents [69]. Moreover, caffeine may facilitate intestinal CHO absorption via an enhanced sodium-glucose-linked transporter activity [70]. An increased absorption of CHO would likely be concomitant with

an elevated splanchnic blood flow [71] causing a slight reduction in skin blood flow [72], thereby leading to an impaired thermoregulation.

Several aspects need to be considered and kept in mind when interpreting the current results. First, the literature search was limited to English and French citations; thus, studies published in other languages may have been missed. Our results may not apply to prolonged exercise, i.e., > 2 h. The exercise intensity and level of the athletes taking part in the included studies may not be comparable to real-world competitive endurance events. Finally, the present results only apply to well-trained adults, primarily males, for walking, running and cycling exercises of ~ 80 min in duration conducted in warm or hot environments with caffeine doses of 3-9 mg/kg taken ~ 1 h before the onset of exercise.

## **5 Recommendations for future studies**

To pursue our understanding of the impact of caffeine ingestion on EP and  $C_T$  regulation under warm or hot conditions, we propose the following perspectives for future studies. 1) Competitive athletes frequently consume caffeine before and during events. They also compete at high intensities and, often, for longer than 60 min. These factors combined increase metabolic heat production, which could have a large influence on heat storage. Whether this may render those athletes more susceptible to heat-related fatigue or illnesses needs to be determined. 2) Co-ingestion of caffeine and CHO is common in competitive athletes during prolonged exercise and there is a strong possibility that these compounds could interact to disproportionately increase  $C_T$ . There is a need to determine the impact of their combined ingestion on  $C_T$  during prolonged exercise. 3) Research in female athletes is scarce. Given the effect of the menstrual cycle on thermoregulatory controls [73] there is a need to examine caffeine's impact on EP and  $C_T$  during the different phases of the menstrual cycle. 4) Recent work has demonstrated that untrained

habituated caffeine consumers show a greater rise in  $C_T$  with caffeine than a placebo during exercise, which is not the case in non-habituated consumers for whom the increase in  $C_T$  with or without caffeine is similar. Whether this observation may also apply to competitive individuals needs to be determined. 5) All future studies designed for and conducted in competitive athletes should increase their efforts to replicate real-world ambient conditions to adequately reflect competitive settings, especially ensuring to mimic the effect of convection [74] and radiation [75] as closely as possible.

## **6 Conclusion**

Findings of the present meta-analysis showed that caffeine ingestion before endurance exercise lasting ~ 70 min in warm or hot environments improves performance by 2% and increases  $C_T$  by 0.10°C/h. The enhancement in EP is considered practically worthwhile, while the impact on thermoregulation is considered trivial. Thus, based on the current results, athletes and their support teams should feel confident in including caffeine as an ergogenic aid strategy before competitive endurance events performed in warm or hot conditions.

### **Key Points:**

What is already known?

- 1) Pre-exercise caffeine ingestion of 2 to 6 mg/kg body mass is known to improve EP in a meaningful way.
- 2) Several studies have investigated the impact of caffeine ingestion upon EP and  $C_T$  regulation under warm or hot environments. Results are divergent but, yet, no meta-analysis has been conducted to determine the magnitude of the effect of caffeine supplementation on these parameters.

What are the new findings?

- 1) From a statistical point of view, EP and the rate of increase in  $C_T$  are enhanced by pre-exercise caffeine ingestion of 3-9 mg/kg body mass 1 h before exercise onset by 2% and 0.10°C/h, respectively.
- 2) From a practical point of view, the impact of pre-exercise caffeine ingestion on EP is important, while that on the rate of increase in  $C_T$  is trivial.

### **Data availability statement**

All the data presented in the article will be made available from the corresponding author upon reasonable request.

### **Acknowledgments**

Thomas A. Deshayes is financially supported by the Fonds de Recherche du Québec - Santé (FRQS). The authors wish to thank the researchers who shared experimental data and provided further information.

### **Funding**

No funding was received for the conduct of the work or preparation of the manuscript.

### **Conflict of interest**

All authors of the current work declare that they have no potential conflicts of interest that are directly relevant to the content of this article.

### **Authors' contributions**

CN, DJ, TP, PC, TAD and EDBG: designed the research and performed the literature search. TP, TAD and EDBG performed the data extraction. TAD and EDBG: performed the statistical analyses. TP, TAD and EDBG: designed the tables and figures. CN, DJ, TP, PC, TAD, LMB and EDBG: interpreted data, drafted and revised the manuscript. All authors approved the final version of the manuscript.

## References

1. Johnson IM, Prakash H, Prathiba J, Raghunathan R, Malathi R. Spectral analysis of naturally occurring methylxanthines (theophylline, theobromine and caffeine) binding with DNA. *PLoS One*. 2012;7(12):e50019.
2. Southward K, Rutherford-Markwick KJ, Ali A. The Effect of Acute Caffeine Ingestion on Endurance Performance: A Systematic Review and Meta-Analysis. *Sports Medicine*. 2018 2018/08//;48(8):1913-28.
3. Aguilar-Navarro M, Muñoz G, Salinero J, Muñoz-Guerra J, Fernández-Álvarez M, Plata M, et al. Urine Caffeine Concentration in Doping Control Samples from 2004 to 2015. *Nutrients*. 2019 2019/01/29//;11(2):286.
4. Desbrow B, Leveritt M. Awareness and use of caffeine by athletes competing at the 2005 Ironman Triathlon World Championships. *Int J Sport Nutr Exerc Metab*. 2006 Oct;16(5):545-58.
5. Doherty M, Smith PM. Effects of Caffeine Ingestion on Exercise Testing: A Meta-Analysis. *International Journal of Sport Nutrition and Exercise Metabolism*. 2004 2004/12//;14(6):626-46.
6. Ganio MS, Klau JF, Casa DJ, Armstrong LE, Maresh CM. Effect of Caffeine on Sport-Specific Endurance Performance: A Systematic Review. *Journal of Strength and Conditioning Research*. 2009 2009/01//;23(1):315-24.
7. Gonçalves Ribeiro B, Pontes Morales A, Sampaio-Jorge F, Tinoco FdS, Matos AAd, Costa Leite T. Acute effects of caffeine intake on athletic performance: A systematic review and meta-analysis. *Revista chilena de nutrición*. 2017 2017;44:283-91.

8. Grgic J, Grgic I, Pickering C, Schoenfeld BJ, Bishop DJ, Pedisic Z. Wake up and smell the coffee: caffeine supplementation and exercise performance—an umbrella review of 21 published meta-analyses. *Br J Sports Med*. 2020 2020/06//;54(11):681-8.
9. Guest NS, VanDusseldorp TA, Nelson MT, Grgic J, Schoenfeld BJ, Jenkins NDM, et al. International society of sports nutrition position stand: caffeine and exercise performance. *J Int Soc Sports Nutr*. 2021 2021/12//;18(1):1.
10. Franco-Alvarenga PE, Brietzke C, Canestri R, Goethel MF, Hettinga F, Santos TM, et al. Caffeine improved cycling trial performance in mentally fatigued cyclists, regardless of alterations in prefrontal cortex activation. *Physiology & Behavior*. 2019 2019/05/15//;204:41-8.
11. Paluska SA. Caffeine and exercise. *Curr Sports Med Rep*. 2003 Aug;2(4):213-9.
12. Beaumont RE, James LJ. Effect of a moderate caffeine dose on endurance cycle performance and thermoregulation during prolonged exercise in the heat. *Journal of Science and Medicine in Sport*. 2017 2017/11//;20(11):1024-8.
13. Ping WC, Keong CC, Bandyopadhyay A. Effects of acute supplementation of caffeine on cardiorespiratory responses during endurance running in a hot & humid climate. *Indian J Med Res*. 2010 2010/07//;132:36-41.
14. Suvi S, Timpmann S, Tamm M, Aedma M, Kreegipuu K, Ööpik V. Effects of caffeine on endurance capacity and psychological state in young females and males exercising in the heat. *Appl Physiol Nutr Metab*. 2017 2017/01//;42(1):68-76.
15. Davis JM, Zhao Z, Stock HS, Mehl KA, Buggy J, Hand GA. Central nervous system effects of caffeine and adenosine on fatigue. *Am J Physiol Regul Integr Comp Physiol*. 2003 Feb;284(2):R399-404.

16. Nehlig A, Debry G. Caffeine and sports activity: a review. *Int J Sports Med.* 1994 Jul;15(5):215-23.
17. Fredholm BB. Astra Award Lecture. Adenosine, adenosine receptors and the actions of caffeine. *Pharmacol Toxicol.* 1995 Feb;76(2):93-101.
18. Galloway SD, Maughan RJ. Effects of ambient temperature on the capacity to perform prolonged cycle exercise in man. *Med Sci Sports Exerc.* 1997 Sep;29(9):1240-9.
19. Tatterson AJ, Hahn AG, Martin DT, Febbraio MA. Effects of heat stress on physiological responses and exercise performance in elite cyclists. *Journal of science and medicine in sport.* 2000 Jun;3(2):186-93.
20. Spriet LL. Exercise and Sport Performance with Low Doses of Caffeine. *Sports Medicine.* 2014 2014/11//;44(S2):175-84.
21. Martins GL, Guilherme JPLF, Ferreira LHB, de Souza-Junior TP, Lancha AH. Caffeine and Exercise Performance: Possible Directions for Definitive Findings. *Frontiers in Sports and Active Living.* 2020 2020-December-11;2(202).
22. Temple JL, Bernard C, Lipshultz SE, Czachor JD, Westphal JA, Mestre MA. The Safety of Ingested Caffeine: A Comprehensive Review. *Frontiers in Psychiatry.* 2017 2017-May-26;8(80).
23. Ganio MS, Johnson EC, Klau JF, Anderson JM, Casa DJ, Maresh CM, et al. Effect of ambient temperature on caffeine ergogenicity during endurance exercise. *Eur J Appl Physiol.* 2011 2011/06//;111(6):1135-46.
24. Roti MW, Casa DJ, Pumerantz AC, Watson G, Judelson DA, Dias JC, et al. Thermoregulatory responses to exercise in the heat: chronic caffeine intake has no effect. *Aviat Space Environ Med.* 2006 Feb;77(2):124-9.



25. Cheuvront SN, Ely BR, Kenefick RW, Michniak-Kohn BB, Rood JC, Sawka MN. No effect of nutritional adenosine receptor antagonists on exercise performance in the heat. *American Journal of Physiology-Regulatory, Integrative and Comparative Physiology*. 2009 2009/02//;296(2):R394-R401.
26. Cohen BS, Nelson AG, Prevost MC, Thompson GD, Marx BD, Morris GS. Effects of caffeine ingestion on endurance racing in heat and humidity. *Europ J Appl Physiol*. 1996 1996/05//;73(3-4):358-63.
27. Hanson NJ, Martinez SC, Byl EN, Maceri RM, Miller MG. Increased Rate of Heat Storage, and No Performance Benefits, With Caffeine Ingestion Before a 10-km Run in Hot, Humid Conditions. *International Journal of Sports Physiology and Performance*. 2019 2019/02//;14(2):196-202.
28. Pitchford NW, Fell JW, Leveritt MD, Desbrow B, Shing CM. Effect of caffeine on cycling time-trial performance in the heat. *Journal of Science and Medicine in Sport*. 2014 2014/07//;17(4):445-9.
29. Roelands B, Buyse L, Pauwels F, Delbeke F, Deventer K, Meeusen R. No effect of caffeine on exercise performance in high ambient temperature. *Eur J Appl Physiol*. 2011 2011/12//;111(12):3089-95.
30. Hunter AM, St Clair Gibson A, Collins M, Lambert M, Noakes TD. Caffeine ingestion does not alter performance during a 100-km cycling time-trial performance. *Int J Sport Nutr Exerc Metab*. 2002 Dec;12(4):438-52.
31. Wemple RD, Lamb DR, McKeever KH. Caffeine vs caffeine-free sports drinks: effects on urine production at rest and during prolonged exercise. *Int J Sports Med*. 1997 Jan;18(1):40-6.

32. LeBlanc J, Jobin M, Côté J, Samson P, Labrie A. Enhanced metabolic response to caffeine in exercise-trained human subjects. *J Appl Physiol* (1985). 1985 Sep;59(3):832-7.
33. Ely BR, Ely MR, Chevront SN. Marginal Effects of a Large Caffeine Dose on Heat Balance During Exercise-Heat Stress. *International Journal of Sport Nutrition and Exercise Metabolism*. 2011 2011/02//;21(1):65-70.
34. Del Coso J, Estevez E, Mora-Rodriguez R. Caffeine during Exercise in the Heat: Thermoregulation and Fluid-Electrolyte Balance. *Medicine & Science in Sports & Exercise*. 2009 2009/01//;41(1):164-73.
35. Kazman JB, Attipoe S, Kupchak BR, Deuster PA. Caffeine and heat have additive but not interactive effects on physiologic strain: A factorial experiment. *Journal of Thermal Biology*. 2020 2020/04//;89:102563.
36. Cureton KJ, Warren GL, Millard-Stafford ML, Wingo JE, Trilk J, Buyckx M. Caffeinated sports drink: ergogenic effects and possible mechanisms. *Int J Sport Nutr Exerc Metab*. 2007 Feb;17(1):35-55.
37. Daniels JW, Molé PA, Shaffrath JD, Stebbins CL. Effects of caffeine on blood pressure, heart rate, and forearm blood flow during dynamic leg exercise. *J Appl Physiol* (1985). 1998 Jul;85(1):154-9.
38. Anderson DE, Hickey MS. Effects of caffeine on the metabolic and catecholamine responses to exercise in 5 and 28 degrees C. *Medicine and Science in Sports and Exercise*. 1994 1994/04//;26(4):453-8.
39. Fujii N, Fujimoto T, Yinhang C, Dobashi K, Matsutake R, Amano T, et al. Caffeine Exacerbates Hyperventilation and Reductions in Cerebral Blood Flow in Physically Fit Men Exercising in the Heat. *Medicine & Science in Sports & Exercise*. 2021 2021/04//;53(4):845-52.

40. Stebbins CL, Daniels JW, Lewis W. Effects of caffeine and high ambient temperature on haemodynamic and body temperature responses to dynamic exercise: Cardiovascular responses to caffeine and exercise in the heat. *Clinical Physiology*. 2001 2001/09/24/;21(5):528-33.
41. Del Coso J, Estevez E, Mora-Rodriguez R. Caffeine effects on short-term performance during prolonged exercise in the heat. *Med Sci Sports Exerc*. 2008 Apr;40(4):744-51.
42. Hunt LA, Hospers L, Smallcombe JW, Mavros Y, Jay O. Caffeine alters thermoregulatory responses to exercise in the heat only in caffeine-habituated individuals: a double-blind placebo-controlled trial. *J Appl Physiol (1985)*. 2021 Aug 26.
43. Peel JS, McNarry MA, Heffernan SM, Nevola VR, Kilduff LP, Waldron M. The Effect of Dietary Supplements on Endurance Exercise Performance and Core Temperature in Hot Environments: A Meta-analysis and Meta-regression. *Sports Med*. 2021 Jun 15.
44. Conger SA, Warren GL, Hardy MA, Millard-Stafford ML. Does Caffeine Added to Carbohydrate Provide Additional Ergogenic Benefit for Endurance? *International Journal of Sport Nutrition and Exercise Metabolism*. 2011 2011/02//;21(1):71-84.
45. Shen JG, Brooks MB, Cincotta J, Manjourides JD. Establishing a relationship between the effect of caffeine and duration of endurance athletic time trial events: A systematic review and meta-analysis. *Journal of Science and Medicine in Sport*. 2019 2019/02//;22(2):232-8.
46. Armstrong LE, Casa DJ, Maresh CM, Ganio MS. Caffeine, Fluid-Electrolyte Balance, Temperature Regulation, and Exercise-Heat Tolerance. *Exercise and Sport Sciences Reviews*. 2007 2007/07//;35(3):135-40.
47. Jüni P. The Hazards of Scoring the Quality of Clinical Trials for Meta-analysis. *JAMA*. 1999 1999/09/15/;282(11):1054.

48. Goulet ED. Effect of exercise-induced dehydration on time-trial exercise performance: a meta-analysis. *British journal of sports medicine*. 2011 Nov;45(14):1149-56.
49. Goulet ED. Effect of exercise-induced dehydration on endurance performance: evaluating the impact of exercise protocols on outcomes using a meta-analytic procedure. *British journal of sports medicine*. 2013 Jul;47(11):679-86.
50. Goulet EDB. Effect of exercise-induced dehydration on endurance performance: evaluating the impact of exercise protocols on outcomes using a meta-analytic procedure. *British journal of sports medicine*. 2013;47(11):41-5.
51. Follmann D, Elliott P, Suh I, Cutler J. Variance imputation for overviews of clinical trials with continuous response. *J Clin Epidemiol*. 1992 Jul;45(7):769-73.
52. Doi SA, Barendregt JJ, Khan S, Thalib L, Williams GM. Advances in the meta-analysis of heterogeneous clinical trials I: the inverse variance heterogeneity model. *Contemporary clinical trials*. 2015;45:130-8.
53. Hopkins WG. A spreadsheet for deriving a confidence interval, mechanistic inference and clinical inference from a p value. *Sportscience*. 2007;11:16-20.
54. Pelletier DM, Lacerte G, Goulet ED. Effects of quercetin supplementation on endurance performance and maximal oxygen consumption: a meta-analysis. *International journal of sport nutrition and exercise metabolism*. 2013 Feb;23(1):73-82.
55. Savoie FA, Kenefick RW, Ely BR, Chevront SN, Goulet ED. Effect of Hypohydration on Muscle Endurance, Strength, Anaerobic Power and Capacity and Vertical Jumping Ability: A Meta-Analysis. *Sports medicine (Auckland, NZ)*. 2015 Aug;45(8):1207-27.

56. Huedo-Medina TB, Sanchez-Meca J, Marin-Martinez F, Botella J. Assessing heterogeneity in meta-analysis: Q statistic or I2 index? *Psychol Methods*. 2006 Jun;11(2):193-206.
57. Borenstein M, Hedges LV, Higgins JP, Rothstein HR. *Introduction to meta-analysis*. West Sussex, England: John Wiley & Sons Ltd. 2009.
58. Higgins J, Altman D, Sterne A. *Cochrane Handbook for Systematic Reviews of Interventions*. Version. 2011;5(0).
59. Duval S, Tweedie R. Trim and fill: A simple funnel-plot-based method of testing and adjusting for publication bias in meta-analysis. *Biometrics*. 2000 Jun;56(2):455-63.
60. Deshayes TA, Jeker D, Goulet EDB. Impact of Pre-exercise Hypohydration on Aerobic Exercise Performance, Peak Oxygen Consumption and Oxygen Consumption at Lactate Threshold: A Systematic Review with Meta-analysis. *Sports medicine (Auckland, NZ)*. 2020 Mar;50(3):581-96.
61. Volkow ND, Wang GJ, Logan J, Alexoff D, Fowler JS, Thanos PK, et al. Caffeine increases striatal dopamine D2/D3 receptor availability in the human brain. *Transl Psychiatry*. 2015 Apr 14;5(4):e549.
62. Ferré S. An update on the mechanisms of the psychostimulant effects of caffeine. *J Neurochem*. 2008 May;105(4):1067-79.
63. Solinas M, Ferré S, You ZB, Karcz-Kubicha M, Popoli P, Goldberg SR. Caffeine induces dopamine and glutamate release in the shell of the nucleus accumbens. *J Neurosci*. 2002 Aug 1;22(15):6321-4.

64. Watson P, Hasegawa H, Roelands B, Piacentini MF, Loooverie R, Meeusen R. Acute dopamine/noradrenaline reuptake inhibition enhances human exercise performance in warm, but not temperate conditions. *J Physiol*. 2005 Jun 15;565(Pt 3):873-83.
65. Meeusen R, Roelands B. Central fatigue and neurotransmitters, can thermoregulation be manipulated? *Scand J Med Sci Sports*. 2010 Oct;20 Suppl 3:19-28.
66. Diamond A, Lye CT, Prasad D, Abbott D. One size does not fit all: Assuming the same normal body temperature for everyone is not justified. *PLoS One*. 2021;16(2):e0245257.
67. Zheng X, Hasegawa H. Central dopaminergic neurotransmission plays an important role in thermoregulation and performance during endurance exercise. *Eur J Sport Sci*. 2016 Oct;16(7):818-28.
68. Millard-Stafford ML, Cureton KJ, Wingo JE, Trilk J, Warren GL, Buyckx M. Hydration during exercise in warm, humid conditions: effect of a caffeinated sports drink. *Int J Sport Nutr Exerc Metab*. 2007 Apr;17(2):163-77.
69. Thornley S, Russell B, Kydd R. Carbohydrate reward and psychosis: an explanation for neuroleptic induced weight gain and path to improved mental health? *Curr Neuropharmacol*. 2011;9(2):370-5.
70. Van Nieuwenhoven MA, Brummer RM, Brouns F. Gastrointestinal function during exercise: comparison of water, sports drink, and sports drink with caffeine. *J Appl Physiol* (1985). 2000 Sep;89(3):1079-85.
71. Rehrer NJ, Goes E, DuGardeyn C, Reynaert H, DeMeirleir K. Effect of carbohydrate on portal vein blood flow during exercise. *Int J Sports Med*. 2005 Apr;26(3):171-6.
72. Crandall CG, Wilson TE. Human cardiovascular responses to passive heat stress. *Compr Physiol*. 2015 Jan;5(1):17-43.

73. Lei TH, Cotter JD, Schlader ZJ, Stannard SR, Perry BG, Barnes MJ, et al. On exercise thermoregulation in females: interaction of endogenous and exogenous ovarian hormones. *The Journal of physiology*. 2019 Jan;597(1):71-88.
74. Saunders AG, Dugas JP, Tucker R, Lambert MI, Noakes TD. The effects of different air velocities on heat storage and body temperature in humans cycling in a hot, humid environment. *Acta Physiol Scand*. 2005 Mar;183(3):241-55.
75. Otani H, Kaya M, Tamaki A, Watson P, Maughan RJ. Effects of solar radiation on endurance exercise capacity in a hot environment. *Eur J Appl Physiol*. 2016 Apr;116(4):769-79.

**Table 1.** Summary of characteristics of included studies.

| References               | Participants: total n (women), age (years), training state, $\dot{V}O_{2max}$ (mL/kg/min), daily caffeine intake (mg/kg/day) | Caffeine supplementation protocol: dose (mg/kg), mode of administration, ingestion time before exercise onset (min), placebo (y/n), single or double-blind, caffeine restriction before trial (h) | Exercise protocol: total duration (min), exercise mode, exercise intensity, temperature ( $^{\circ}C$ ), relative humidity (%), wind speed (km/h), fluid intake | Core body temperature: measured (y/n), measurement site, measurement time point, conclusion                                     | Endurance performance: measured (y/n), conclusion          |
|--------------------------|------------------------------------------------------------------------------------------------------------------------------|---------------------------------------------------------------------------------------------------------------------------------------------------------------------------------------------------|-----------------------------------------------------------------------------------------------------------------------------------------------------------------|---------------------------------------------------------------------------------------------------------------------------------|------------------------------------------------------------|
| Anderson & Hickey (1994) | 8 (0) moderately trained, 24, 49, < 0.7.                                                                                     | 5, pill, 30, y, double-blind, 96.                                                                                                                                                                 | 60, cycling at 50% $\dot{V}O_{2max}$ , 28, 50, -, -.                                                                                                            | Y, rectal, every 10 min, no differences.                                                                                        | N                                                          |
| Beaumont et al., (2017)  | 8 (0) recreationally active, 22, 56, 1.6.                                                                                    | 6, pill, 60, y, double-blind, 24.                                                                                                                                                                 | 60+30, cycling at 55% $P_{max}$ (61% $\dot{V}O_{2max}$ ) followed by a time-trial (68% $\dot{V}O_{2max}$ ), 30, 50, -, 150 mL each 15 min.                      | Y, gastrointestinal, every 5 min, no differences during fixed intensity but higher from 20 to 30 min during performance in CAF. | Y, performance improved in CAF.                            |
| Chevront et al., (2009)  | 10 (0) physically active, 23, 45, 0.8.                                                                                       | 9, pill, 90, y, double-blind, 96.                                                                                                                                                                 | 30+15, cycling at 52% $\dot{V}O_{2max}$ followed by a time-trial (68% $\dot{V}O_{2max}$ ), 40, 25, -, 240 mL to replace fluid losses of the 30 min preload.     | Y, rectal, every 10 min at fixed intensity and 5 min during performance, higher in CAF.                                         | Y, no difference for performance.                          |
| Cohen et al., (1996)     | 7 (2) well-trained competitors, 33, -, range 0-4.1.                                                                          | 5 and 9, pill, 60, y, double-blind, 24.                                                                                                                                                           | 89, 21-km outdoor running, -, 32.5 <sup>s</sup> , 60 <sup>s</sup> , -, <i>ad libitum</i> at each 5-km point.                                                    | Y, tympanic, pre- and post-performance, no differences (excluded from the analysis).                                            | Y, no difference for performance neither at 5 nor 9 mg/kg. |



|                         |                                              |                                                                                        |                                                                                                                                             |                                                                                                                                                                          |                                                                  |
|-------------------------|----------------------------------------------|----------------------------------------------------------------------------------------|---------------------------------------------------------------------------------------------------------------------------------------------|--------------------------------------------------------------------------------------------------------------------------------------------------------------------------|------------------------------------------------------------------|
| Del Coso et al., (2008) | 7 (0) endurance trained, 27, 61, < 0.8.      | 6, pill, 45, y, double-blind, 48.                                                      | 120, cycling at 63% $\dot{V}O_{2max}$ , 36, 29, 6.8, no fluid in the NF condition and 2400 mL in the WAT condition.                         | Y, rectal, every 20 min, data obtained from authors, no differences, but core temperature tended to be higher with CAF+CHO compared to CHO (excluded from the analysis). | Y, performance improved in CAF but not included in the analyses. |
| Fujii et al., (2020)    | 12 (0) physically active, 23, 48, -.         | 5, pill, 55, y, single-blind, 12.                                                      | 45, semi-recumbent cycling at 55% $\dot{V}O_{2max}$ , 37, 50, -, no fluid.                                                                  | Y, esophageal, data obtained from authors, no differences.                                                                                                               | N                                                                |
| Ganio et al., (2011)    | 11 (0) trained cyclists, 25, 59, 0.7.        | 6, pill, 3 mg/kg 60 min before and 3 mg/kg at 45 min of exercise, y, double-blind, 72. | 90+15, cycling at 65% $\dot{V}O_{2max}$ followed by a time-trial (67% $\dot{V}O_{2max}$ ), 33, 41, 11.9, before and every 15 min (1720 mL). | Y, rectal, every 15 min, no differences.<br><br>Only the first 45 min is included on the analysis                                                                        | Y, performance improved in CAF.                                  |
| Hanson et al., (2019)   | 10 (4) trained endurance runners, 26, 58, -. | 3 and 6, liquid, 60, y, single-blind, -.                                               | 53, 10-km running time-trial (85% $\dot{V}O_{2max}$ ), 31, 50, -, -.                                                                        | Y, gastrointestinal, every 1 km, no differences but core temperature tended to be higher with 6 mg/kg CAF compared to PLA.                                               | Y, no difference for performance neither at 3 nor 6 mg/kg.       |
| Hunt et al., (2021)     | 28 (10), 25, 43, 1.8.                        | 5, pill, 60, y, double-blind, 24.                                                      | 60, cycling at 54% $\dot{V}O_{2max}$ , 31, 31, 1, -.                                                                                        | Y, esophageal, every 15 min, core temperature increased in caffeine-habituated individuals but not in non-habituated individuals.                                        | N                                                                |

|                         |                                          |                                        |                                                                                                                        |                                                                           |                                   |
|-------------------------|------------------------------------------|----------------------------------------|------------------------------------------------------------------------------------------------------------------------|---------------------------------------------------------------------------|-----------------------------------|
| Kazman et al., (2020)   | 35 (6) physically fit, 27, 50, 0.7.      | 7.5, pill, 60, y, double-blind, 12.    | 60, walking at 40% $\dot{V}O_{2max}$ , 40, 40, -, <i>ad libitum</i> (1210 mL).                                         | Y, rectal, every 15 min, higher in CAF near the end of the exercise.      | N                                 |
| Ping et al., (2010)     | 9 (0) recreational runners, 25, 51, 0.4. | 5, pill, 60, y, double-blind, -.       | 97, running time to exhaustion at 70% $\dot{V}O_{2max}$ , 31, 69, -, 3 mL/kg each 20 min.                              | Y, rectal, every 10 min, no differences.                                  | Y, performance improved in CAF.   |
| Roelands et al., (2011) | 8 (0) trained, 23 55*, 1.4.              | 6, pill, 60, y, double-blind, 48.      | 97, cycling at 59% $\dot{V}O_{2max}$ followed by a time-trial (69% $\dot{V}O_{2max}$ ), 30, 55, -, <i>ad libitum</i> . | Y, rectal, every 5 min, higher in CAF from 25 min to the end of exercise. | Y, no difference for performance. |
| Roti et al., (2006)     | 59 (0) physically active, 22, -, 1.3.    | 3 and 6, pill, 60, y, double-blind, 0. | 79, walking at 67% $\dot{V}O_{2max}$ , 38, 56, -, no fluid.                                                            | Y, rectal, every 15 min, no differences.                                  | N                                 |

References are listed in alphabetical order for both sections. CAF: caffeine condition, CHO: carbohydrate, PLA: placebo condition, -:

missing data, \*: estimated  $\dot{V}O_{2max}$  using Hawley & Noakes (1992) equations, §: values were taken as reported in Armstrong et al., (2007),

y/n: yes/no.

## Figure legends

### Figure 1.

Flowchart showing the selection process used for the inclusion and exclusion of studies.

### Figure 2.

Forest plot showing the mean weighted change in endurance performance between the caffeine and placebo conditions. CI: confidence interval.

### Figure 3.

Forest plot showing the mean weighted difference in the rate of increase in core temperature between the caffeine and placebo conditions. CI: confidence interval;  $C_T$ : core temperature.  $\Delta$  rate: caffeine - placebo. Favours caffeine: rate of increase in core temperature is lower with caffeine; Favours placebo: rate of increase in core temperature is lower with placebo.

### Figure 4.

Relationships between the changes in the rate of increase in core temperature between the caffeine and placebo conditions and caffeine dose (a) and elapsed time between caffeine intake and exercise onset (b).  $\Delta$  rate: caffeine - placebo.

### Figure 5.

Relationships between the changes in the rate of increase in core temperature between the caffeine and placebo conditions and temperature (a), relative humidity (b), exercise duration (c) and exercise intensity (d).  $\Delta$  rate: caffeine - placebo.

**Figure 1**

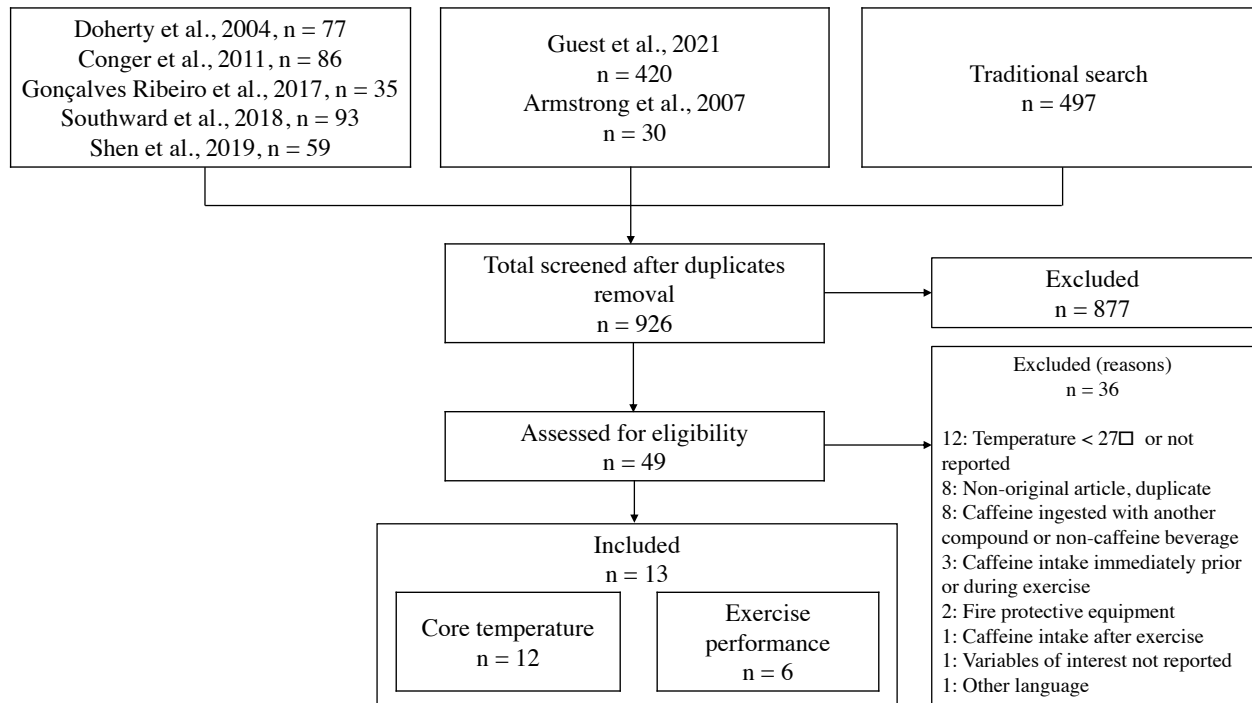

**Figure 2**

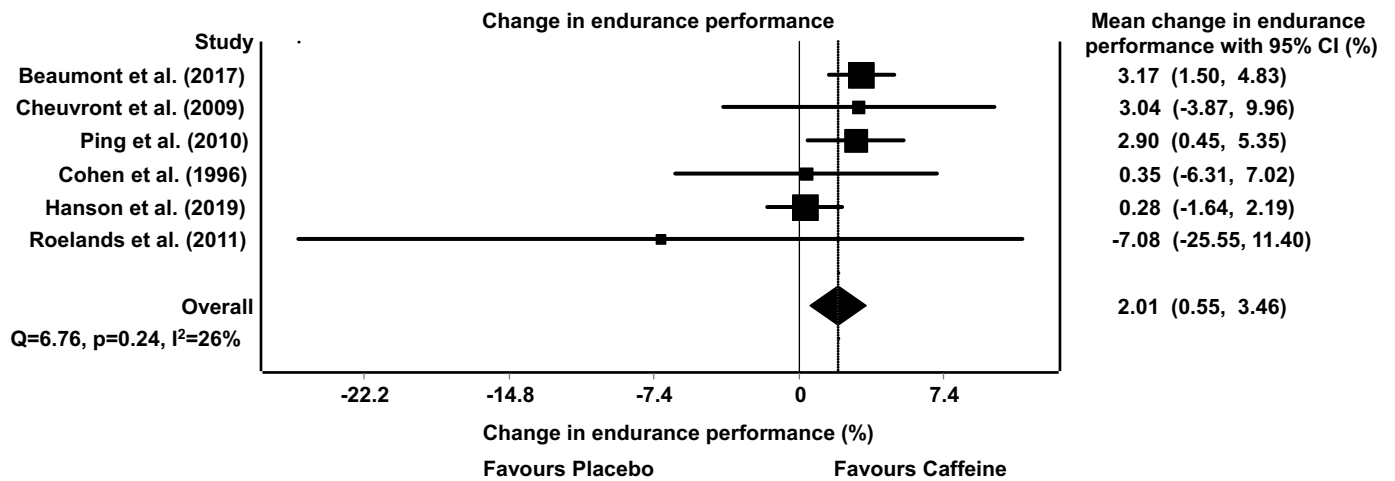

Figure 3

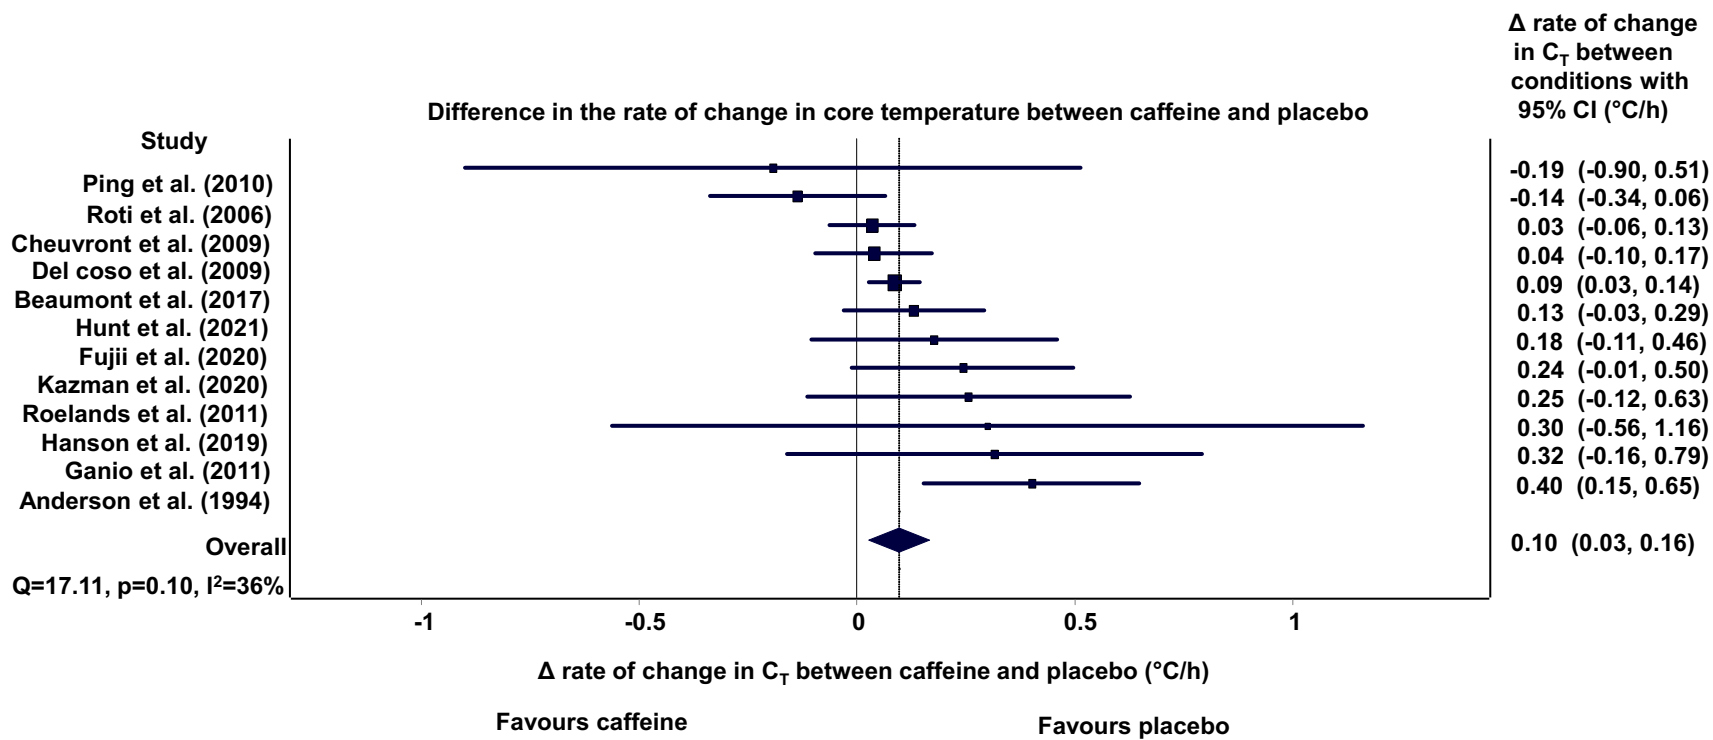

Figure 4

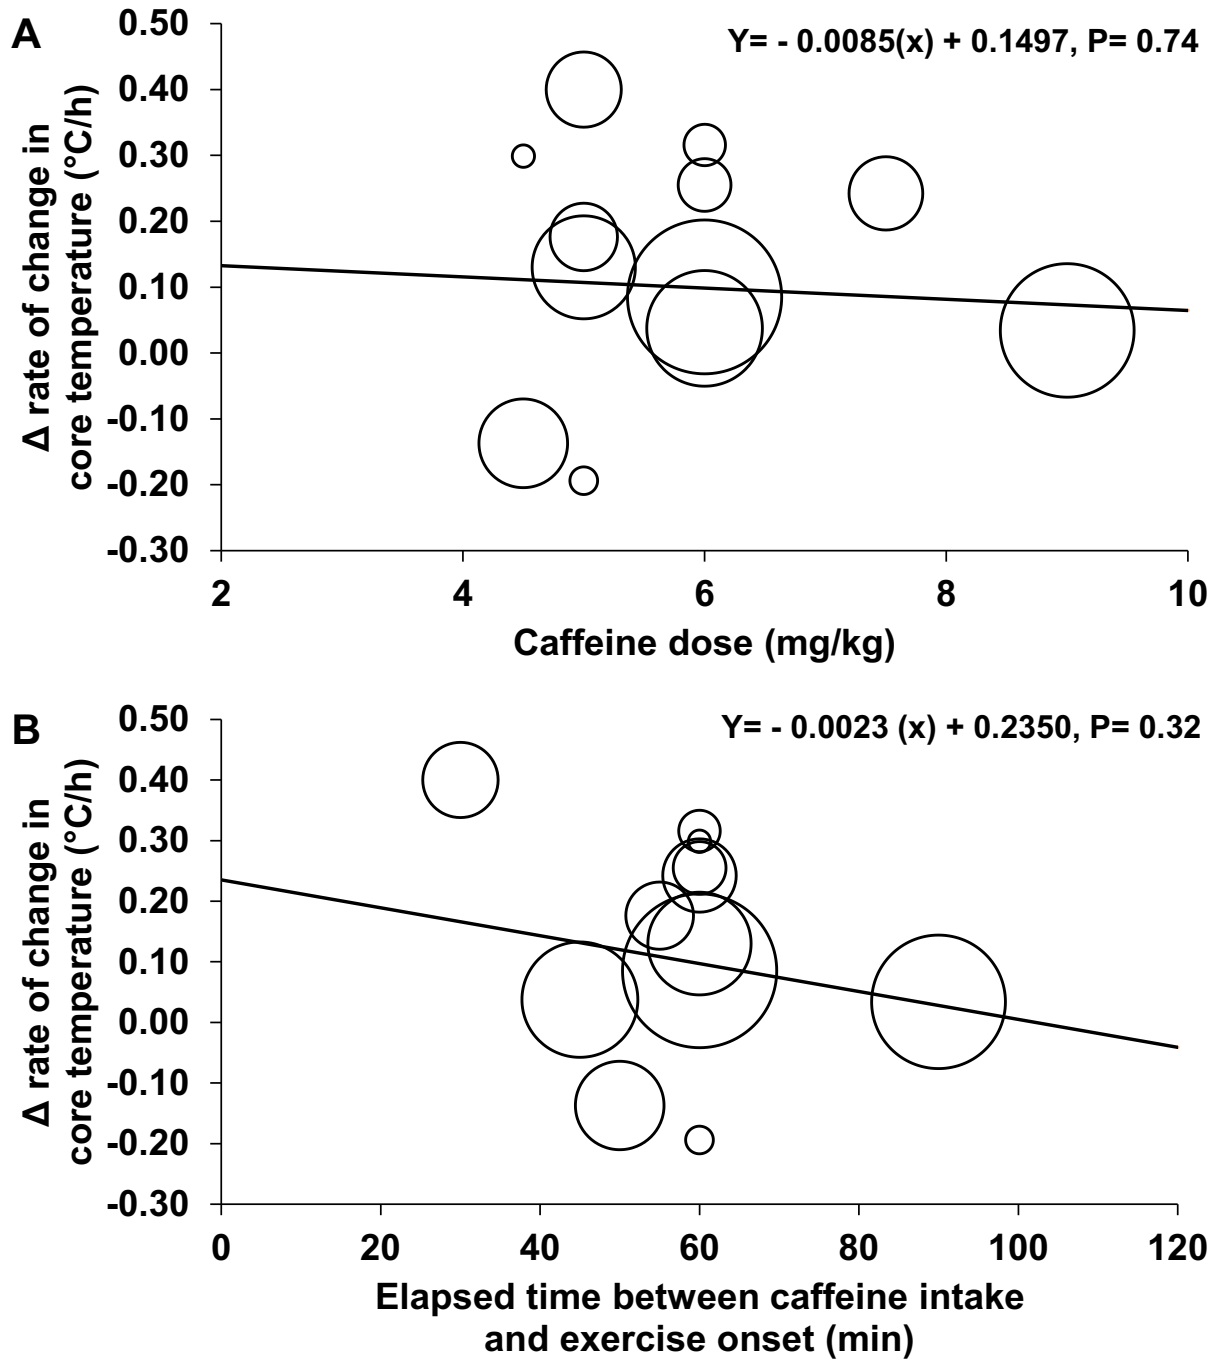

**Figure 5**

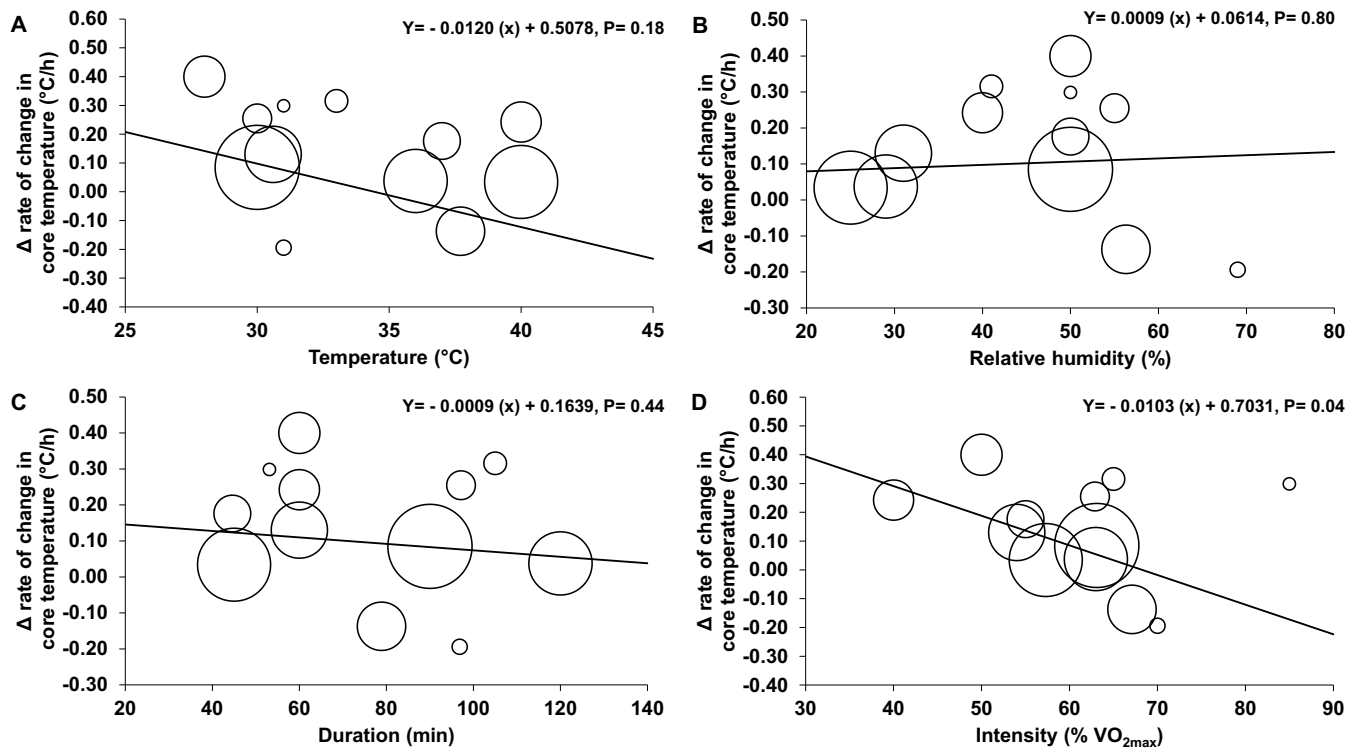

Source: https://medrxiv.org/content/10.1101/2021.09.15.21263601v1.full.pdf
